# Supplementary material for: Large‐scale genetic screens identify BET‐1 as a cytoskeleton regulator promoting actin function and life span
Source: PubMed Central journal article supplement (PMC9835578; doi:10.1111/acel.13742), 2022-11-20
Supplement: ACEL-22-e13742-s009.pdf [file ACEL-22-e13742-s009.pdf]

SUPPLEMENTARY FIGURES, TABLES, LEGENDS.

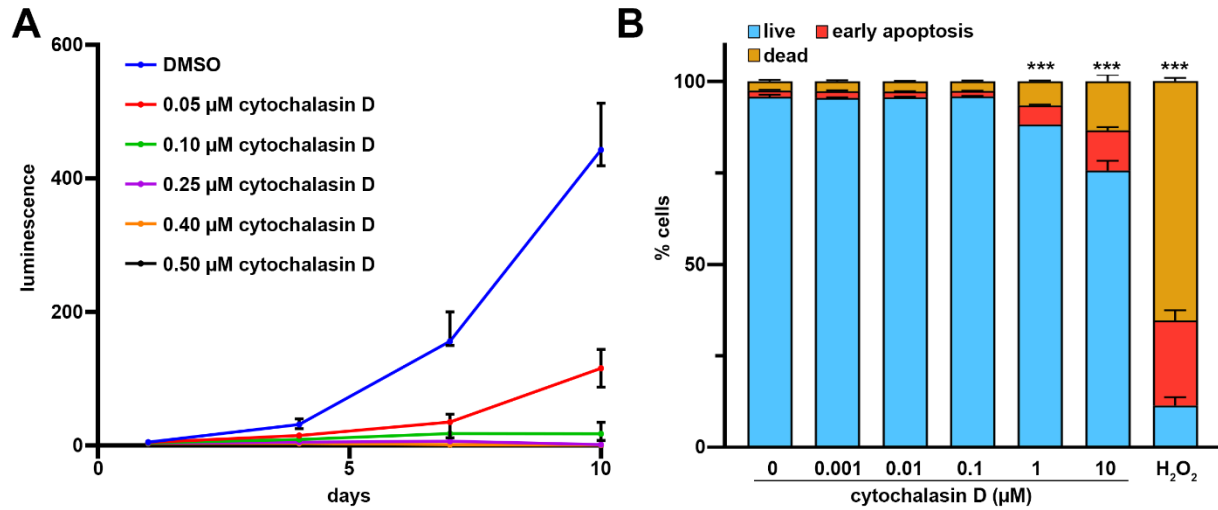

**Fig. S1. Low concentrations of cytochalasin D affects growth rate without inducing apoptosis.** (A) Cell density was determined via CellTiter-Glo analysis in BJ fibroblasts at day 1, day 4, and day 10 of exposure to indicated concentration of cytochalasin D or DMSO control as described in **Materials and Methods**.  $n = 4$  per condition and data is represented as median  $\pm$  interquartile range. (B) BJ fibroblasts were treated with cytochalasin D at indicated doses for 24 hours or 30 mM  $\text{H}_2\text{O}_2$  for 3 hours as a positive control for inducing cell death. Cell death was measured using annexin V and Live/Dead staining followed by flow cytometry as described in **Materials and Methods**. Two-way ANNOVA with Dunnetts test was used to compare the ratio of live cells between control (0) and each drug-treated group.  $n = 3$  with 2 biological replicates.

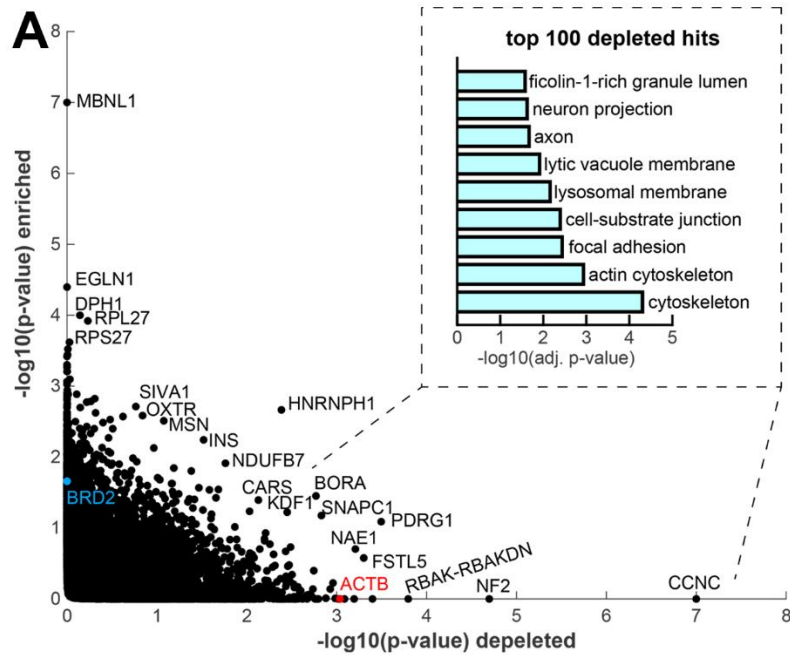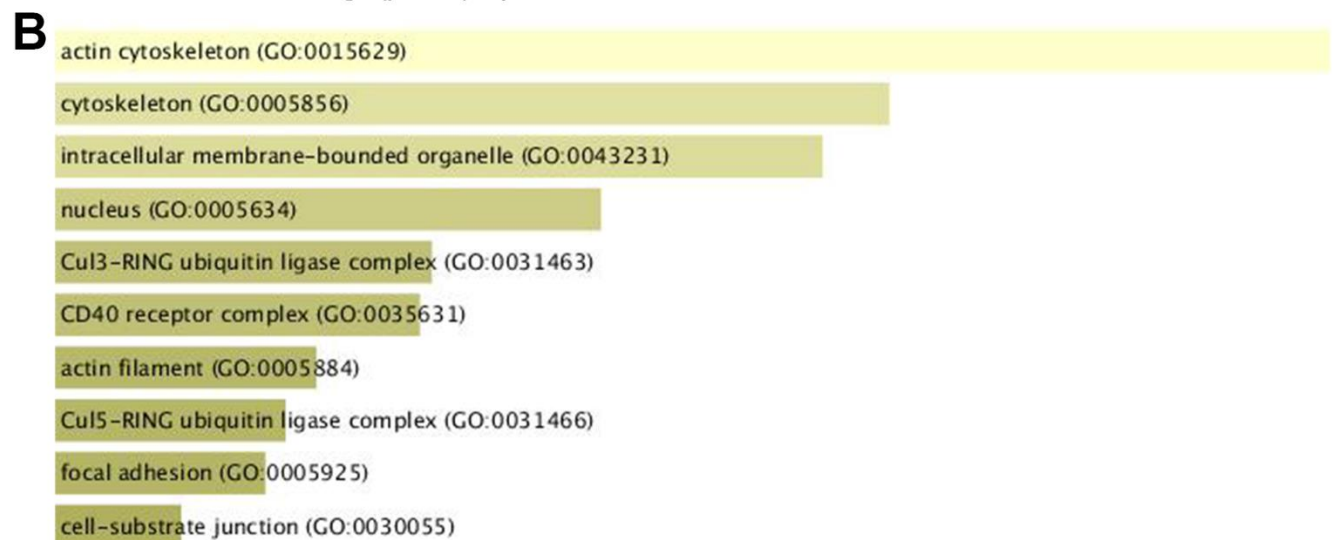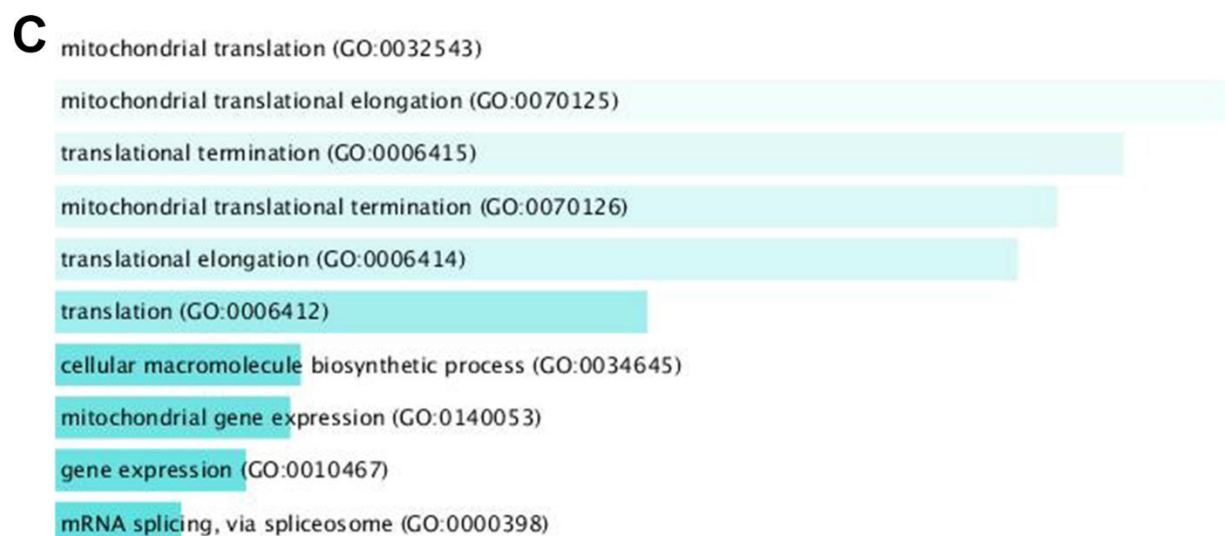

**Fig. S2. Cytochalasin CRISPR-Cas9 screening. (A)** The p-values (max p-val) of each gene when calculated for enriched and depleted genes, upon cytochalasin D treatment, is shown. (inset) enrichment analysis for cellular components of the top 100 depleted genes (Chen et al., 2013). All significantly depleted **(B)** and enriched **(C)** genes were defined as those with a p-value < 0.05 and can be found in **Table S1-2**. Complete lists of GO terms are found in **Table S3** (depleted) and **Table S4** (enriched). Gene lists were run through Enrichr and gene ontologies (GO) for cellular component were graphed and sorted by p-value ranking. All raw counts are available on **Table S5**.

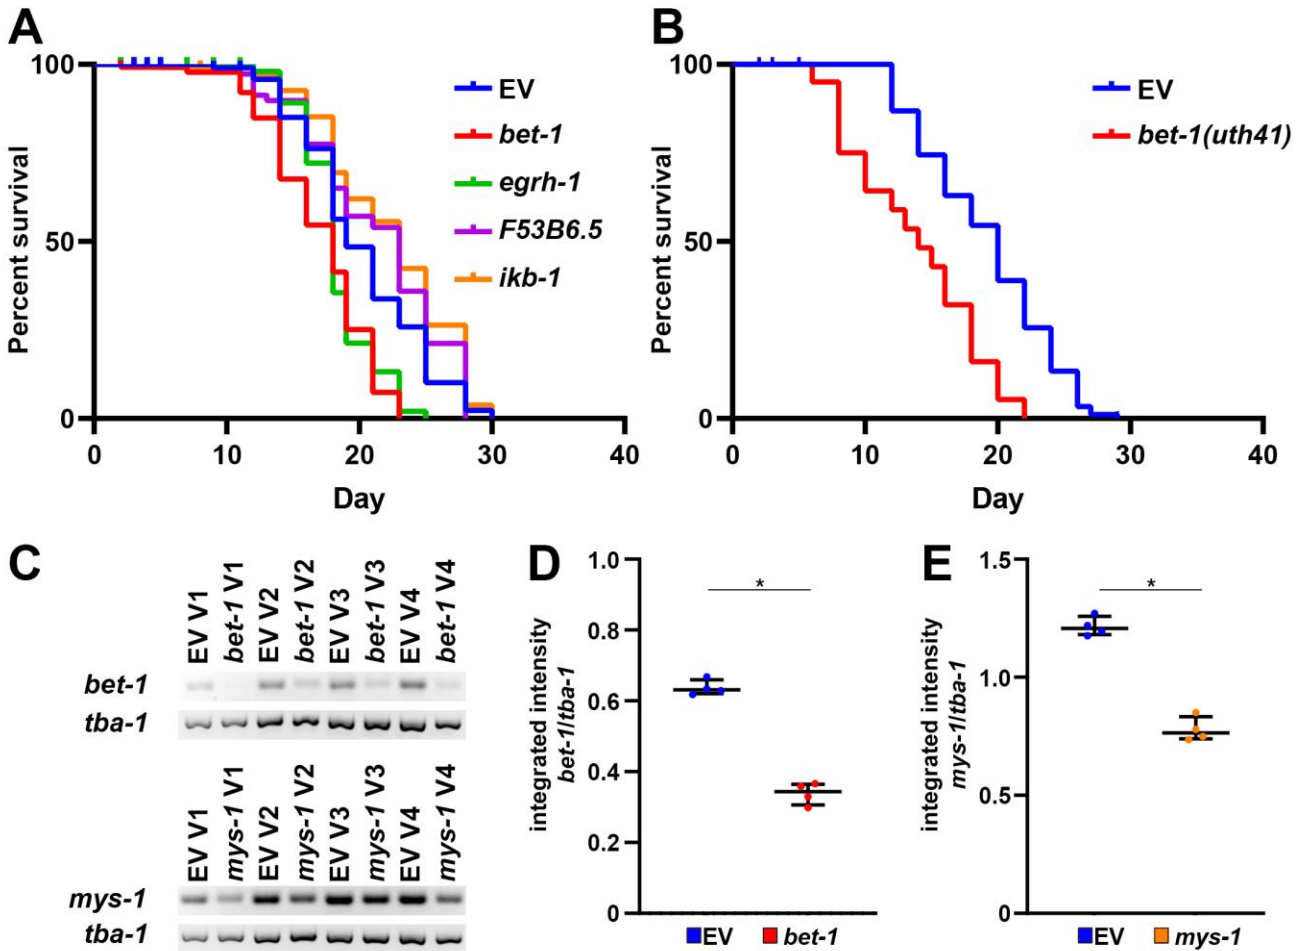

**Fig. S3. Knockdown and knockout of *bet-1* decrease lifespan.** (A) Lifespans of wild-type, N2 animals grown on empty vector (EV, blue, p-values against N2), *bet-1* (red,  $p < 0.001$ ), *egrh-1* (green,  $p < 0.001$ ), *F53B6.5* (purple,  $p =$  not significant), or *ikb-1* (orange,  $p =$  not significant) RNAi from hatch. See **Table S6-7** for complete lifespan statistics. (B) Lifespans of wild-type N2 animals (blue) and *bet-1(uth41)* mutant animals (red) grown on empty vector RNAi from hatch.  $p < 0.001$ . See **Table S6-7** for complete lifespan statistics. (C) RT-PCR of transcripts in N2 animals grown on empty vector (EV), *bet-1*, or *mys-1* RNAi from hatch. RNA was isolated in day 1 adults, followed by cDNA synthesis and PCR. Quantification was performed in ImageJ measuring the integrated intensity of bands and normalizing against a *tba-1* loading control. **B** Image shows PCR band for each of four biological replicates (V1-V4). Right side are dot plots for *bet-1* RNAi (D) and *mys-1* RNAi (E) where each dot represents a single biological replicate and lines represent median and interquartile range. \* =  $p < 0.05$  calculated using non-parametric Mann-Whitney testing.

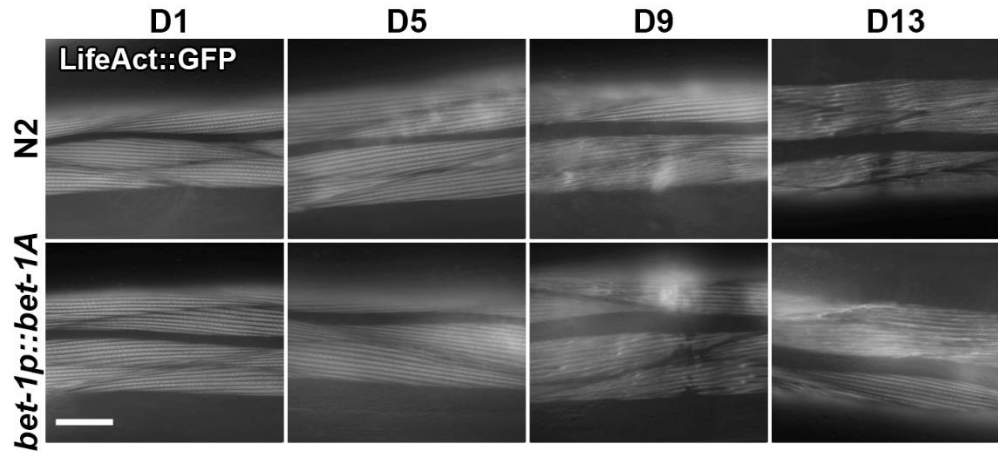

**Fig. S4. *bet-1A* overexpression does not impact actin filaments during aging.**

Representative fluorescent images of adult animals expressing LifeAct::GFP from a muscle-specific promoter, *myo-3p*. Wild-type, N2 and *bet-1A* overexpression (*bet-1p::bet-1A*) animals were grown on empty vector (EV) RNAi from hatch and imaged at day 1, 5, 9, and 13 of adulthood. Images were captured on a Leica Thunder Imager. Scale bar is 10  $\mu$ m.

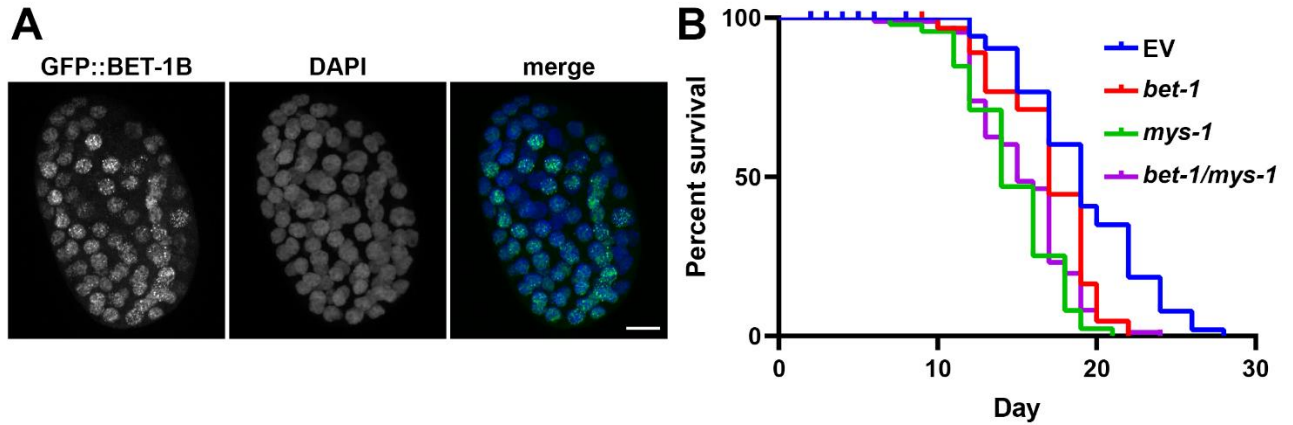

**Fig. S5. BET-1 functions as a transcriptional regulator. (A)** Animals overexpressing *GFP::bet-1B* were grown on empty vector RNAi from hatch. Eggs were isolated by a standard bleaching protocol, fixed using 4% PFA, and counterstained with DAPI as described in STAR Methods. Images were collected on a Leica Stellaris 5 confocal. Scale bar is 5  $\mu$ m. **(B)** Lifespans of wild-type, N2 animals grown on empty vector (EV, blue) or a 50/50 mix of EV/*bet-1* (red), EV/*mys-1* (green), or *bet-1/mys-1* (purple) from hatch. See **Table S6-7** for lifespan statistics. All p-values < 0.0001 vs. N2.

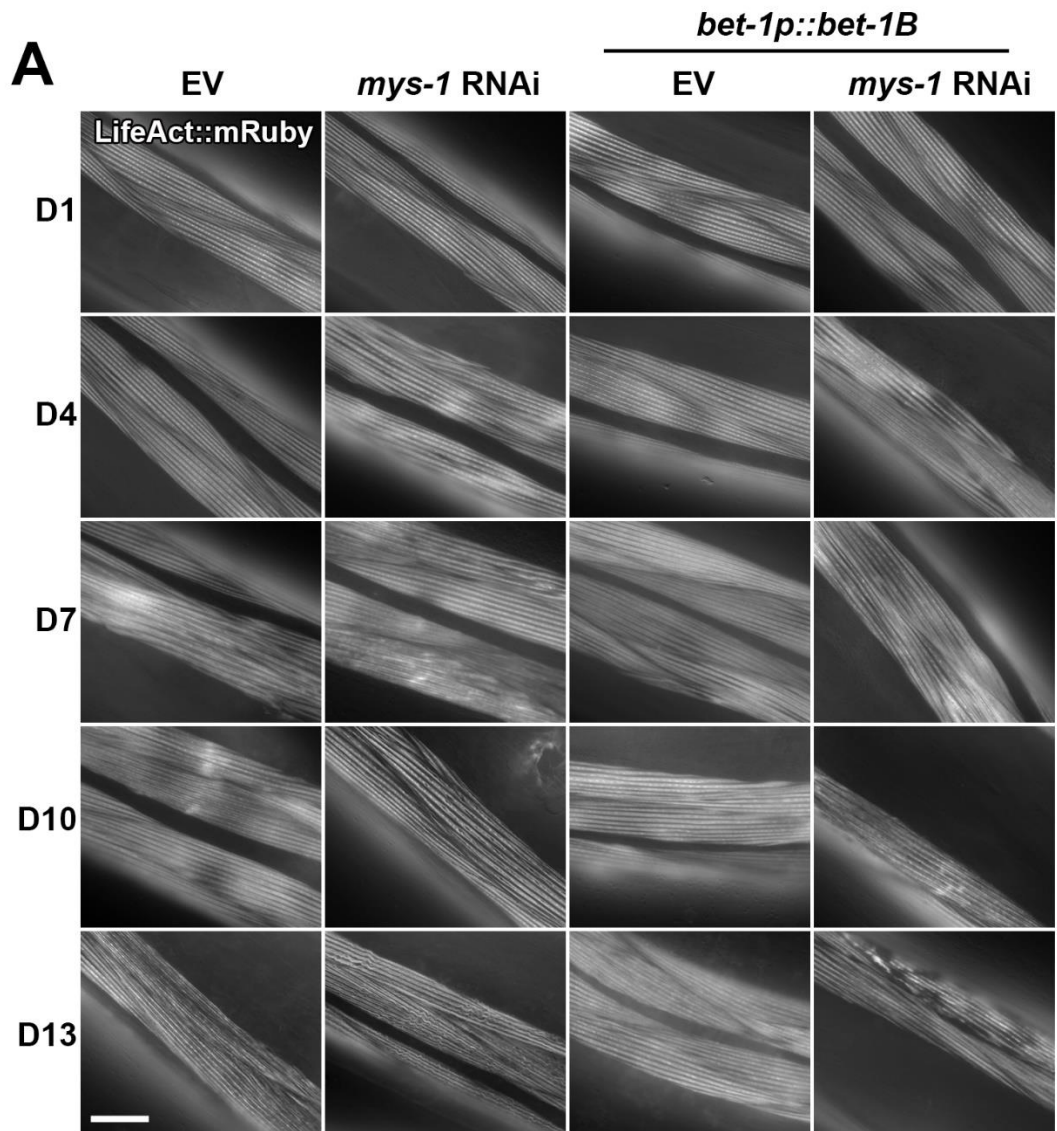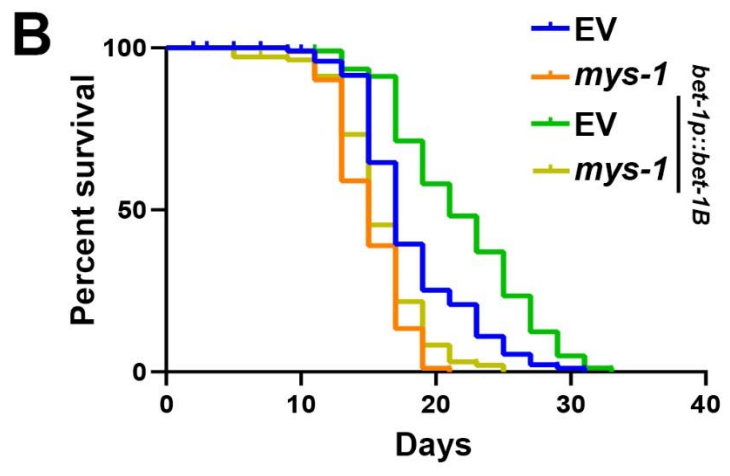

**Fig. S6. *mys-1* is required for BET-1 mediated effects on actin and lifespan. (A)**

Representative fluorescent images of adult animals expressing LifeAct::mRuby from a muscle-specific promoter, *myo-3p*. Wild-type, N2 and *bet-1B* overexpression (*bet-1p::bet-1B*) animals were grown on empty vector (EV) or *mys-1* RNAi from hatch and imaged at day 1, 4, 7, 10, and 13 of adulthood. Images were captured on a Zeiss AxioObserver.Z1. Scale bar is 10  $\mu$ m. **(B)**

Lifespans of N2 (EV, blue) and *bet-1B* overexpression (*bet-1p::bet-1B*, green) animals grown on EV or *mys-1* RNAi (N2, orange; *bet-1B* overexpression, yellow) from hatch. N2, EV (blue) vs. *bet-1p::bet-1B*, EV (green) =  $p < 0.0001$ ; N2, *mys-1* RNAi (orange) vs. *bet-1p::bet-1*, *mys-1* RNAi (yellow) = not significant. See **Table S6-7** for complete lifespan statistics.



**A**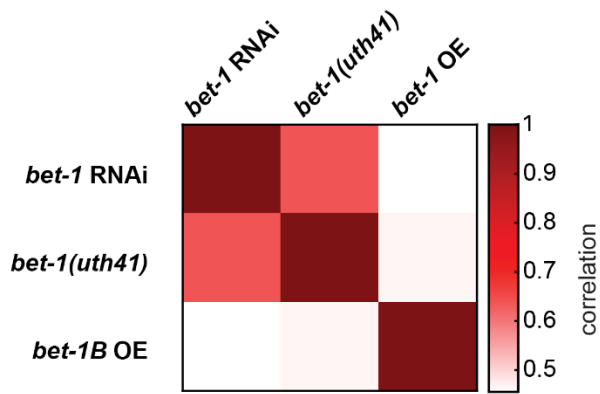**D**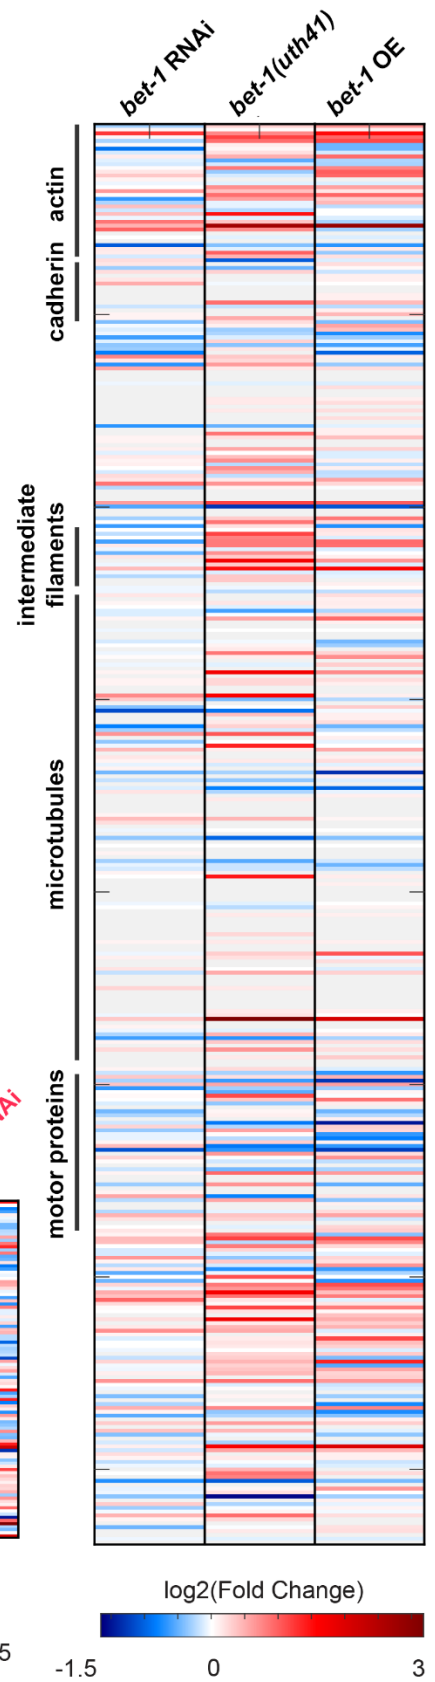**B**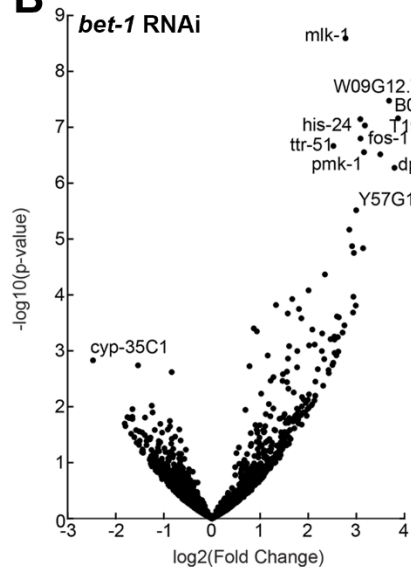**C**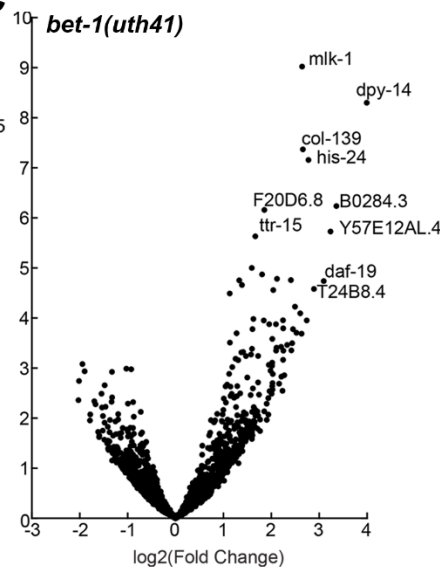**E**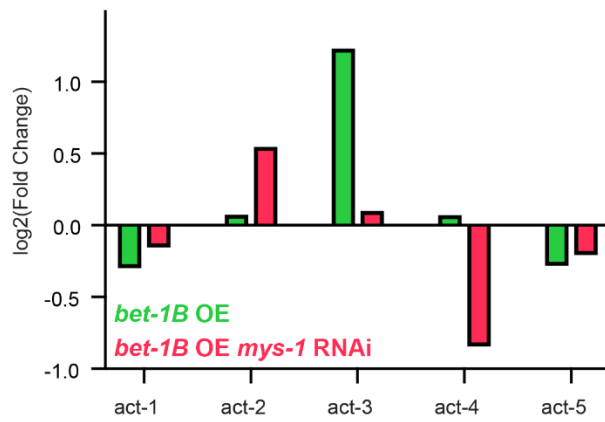**F**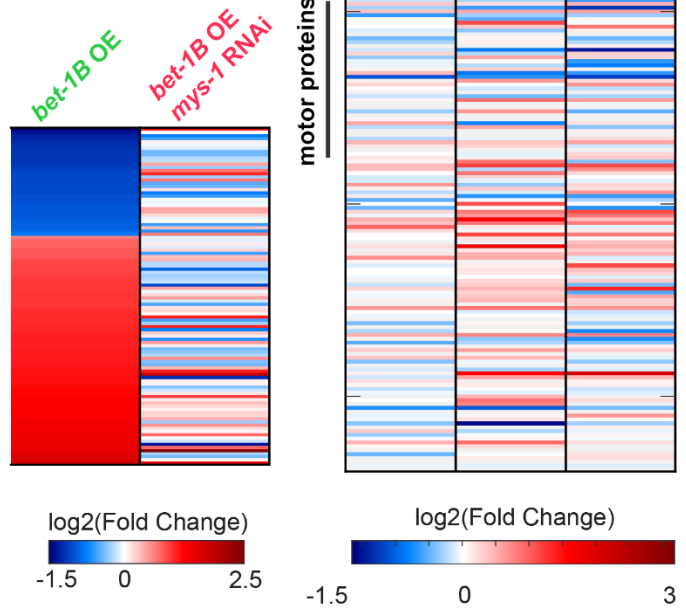

**Fig. S7. Gene expression analysis of bet-1 knockdown, knockout, and over-expression.** (A) Pearson's correlation of log<sub>2</sub>(fold changes) in gene expression between the different datasets, normalized by N2 wild-type control. Gene expression changes, as in Figure 3A, for *bet-1* RNAi (B) or *bet-1* CRISPR mutant (C). (D) Gene expression changes for all cytoskeleton genes as annotated in WormCat (Holdorf et al., 2020): actin function; cadherin; centrosome; claudin; innexin; integrin; intermediate filament protein; microtubule; motor protein; other. (E-F) Changes in differentially expressed genes is dependent on *mys-1*: Gene expression of *bet-1B* over-expressing worms subjected to *mys-1* RNAi was compared to a *mys-1* RNAi only baseline control. The five actin genes are plotted in (E), and all differentially expressed genes in the *bet-1B* over-expressing worms are plotted in (F). See Table S8 for all differentially expressed genes.

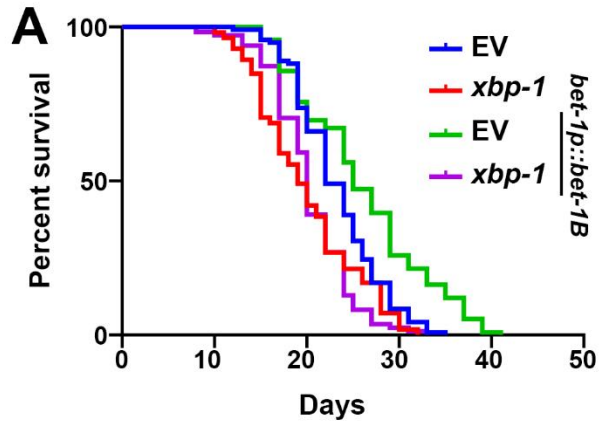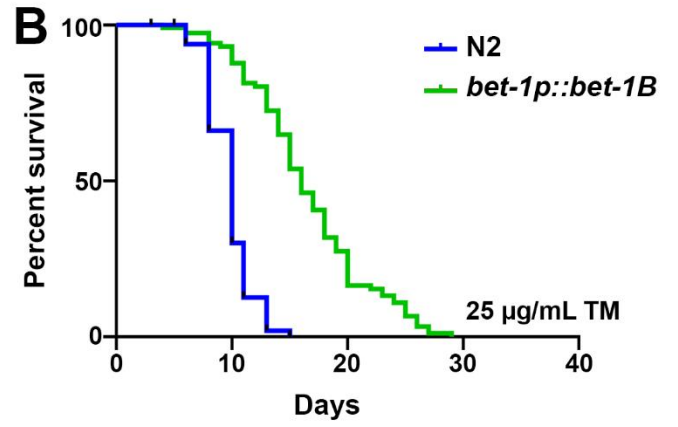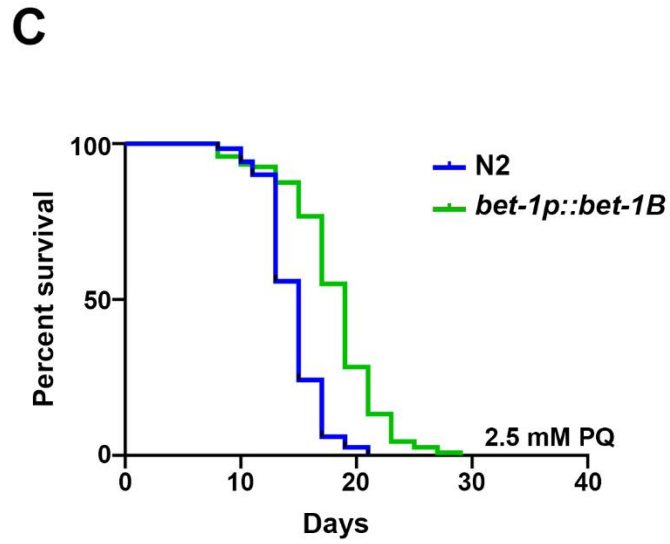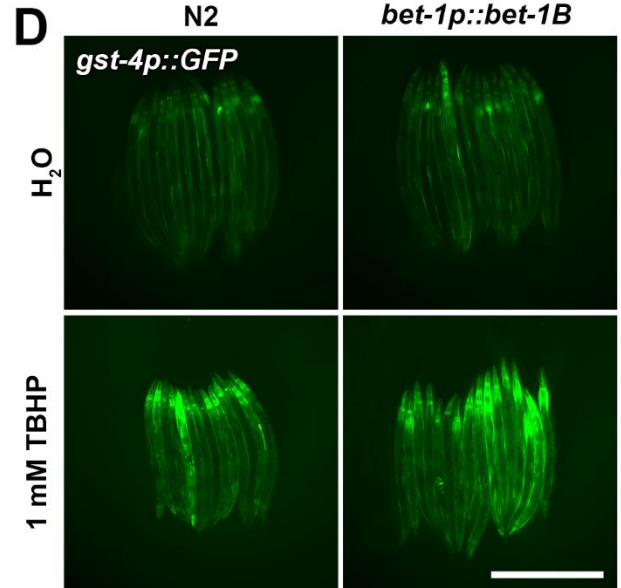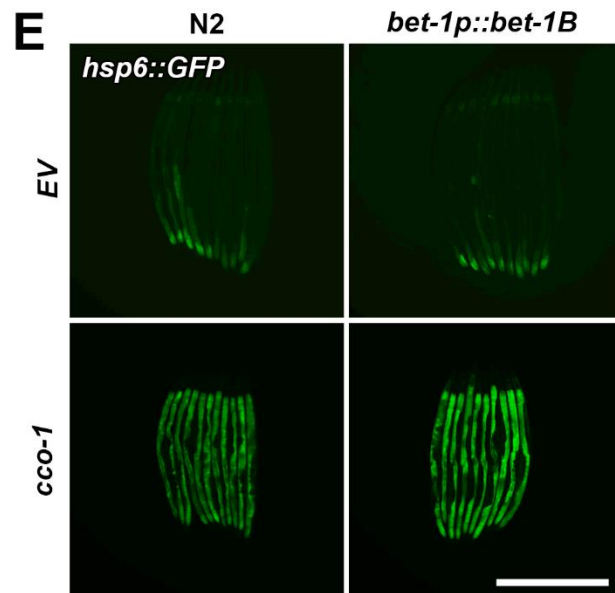

**Fig. S8. *bet-1B* overexpression promotes ER and mitochondrial stress resilience. (A)** Lifespans of N2 (EV, blue) and *bet-1B* overexpression (*bet-1p::bet-1B*, green) animals grown on EV or *xbp-1* RNAi (N2, red; *bet-1B* overexpression, purple) from hatch. N2, EV (blue) vs. *bet-1p::bet-1B*, EV (green) =  $p < 0.0001$ ; N2, *xbp-1* RNAi (red) vs. *bet-1p::bet-1*, *xbp-1* RNAi (purple) = not significant. See **Table S6-7** for complete lifespan statistics. Fig. S8A, S9A, and S9B were performed simultaneously and can be directly compared. **(B)** Survival curve of N2 (blue) and *bet-1B* overexpression (*bet-1p::bet-1B*, green) animals grown on EV from hatch and moved onto plates containing 25  $\mu\text{g}/\text{mL}$  tunicamycin on day 1 of adulthood.  $p < 0.0001$ . See **Table S6-7** for complete lifespan statistics. **(C)** Survival curve of N2 (blue) and *bet-1B* overexpression (*bet-1p::bet-1B*, green) animals grown on EV from hatch and moved onto plates containing 2.5 mM paraquat on L4.  $p < 0.0001$ . See **Table S6-7** for complete lifespan statistics. **(D)** Representative fluorescent images of adult animals expressing *gst-4p::GFP* as a marker for oxidative stress response (SKN-1 transcriptional reporter). Animals were treated with water or 1 mM tert-butyl hydroperoxide (TBHP) as described in **Materials and Methods**. Scale bar is 500  $\mu\text{m}$ . **(E)** Representative fluorescent images of adult animals expressing *hsp-6p::GFP* as a marker for the unfolded protein response of the mitochondria (UPR<sup>MT</sup>). Animals were grown on EV or *cco-1* RNAi (mitochondrial stress by inhibition of electron transport chain) from hatch and imaged at day 1 of adulthood. Scale bar is 500  $\mu\text{m}$ .

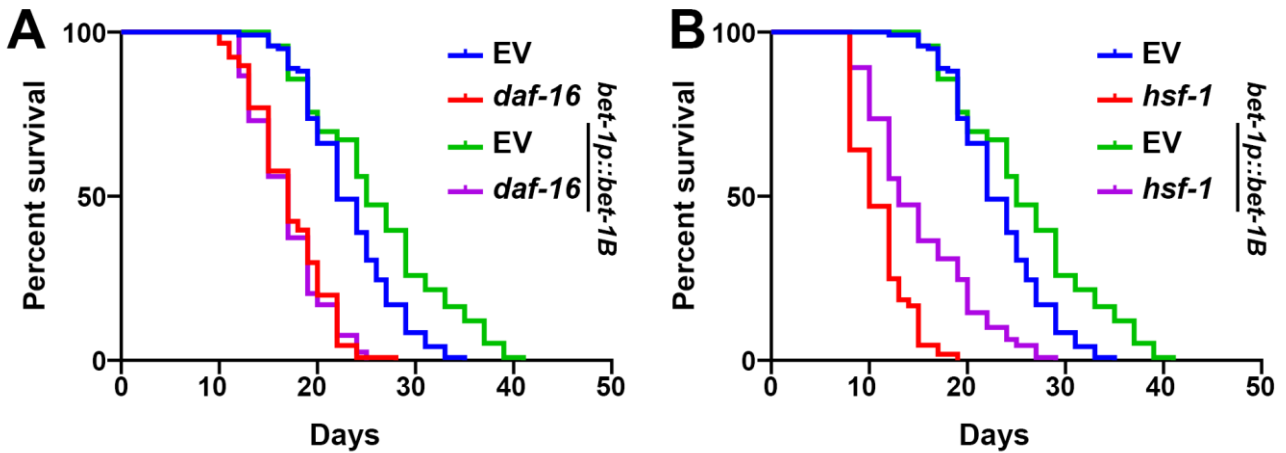

**Fig. S9. Longevity of *bet-1B* overexpressing animals is dependent on *daf-16* and not *hsf-1*.** **(A)** Lifespans of N2 (EV, blue) and *bet-1B* overexpression (*bet-1p::bet-1B*, green) animals grown on EV or *daf-16* RNAi (N2, red; *bet-1B* overexpression, purple) from hatch. N2, EV (blue) vs. *bet-1p::bet-1B*, EV (green) =  $p < 0.0001$ ; N2, *daf-16* RNAi (red) vs. *bet-1p::bet-1*, *daf-16* RNAi (purple) = not significant. See **Table S6-7** for complete lifespan statistics. **(B)** Lifespans of N2 (EV, blue) and *bet-1B* overexpression (*bet-1p::bet-1B*, green) animals grown on EV or *hsf-1* RNAi (N2, red; *bet-1B* overexpression, purple) from hatch. N2, EV (blue) vs. *bet-1p::bet-1B*, EV (green) =  $p < 0.0001$ ; N2, *hsf-1* RNAi (red) vs. *bet-1p::bet-1*, *hsf-1* RNAi (purple) =  $p < 0.0001$ . See **Table S6-7** for complete lifespan statistics. Fig. S8A, S9A, and S9B were performed simultaneously and can be directly compared.

**Table S1. Enriched genes from cytochalasin screen.**

**Table S2. Depleted genes from cytochalasin screen.**

**Table S3. GO Terms for depleted genes from cytochalasin screen.**

**Table S4. GO Terms for enriched genes from cytochalasin screen.**

**Table S5. Raw sgRNA counts from cytochalasin screen.**

**Table S6. Statistics for lifespans.**

**Table S7. Replicates for lifespans.**

**Table S8. Differentially expressed genes from RNA-seq.**
